# Supplementary material for: Plasmids from Food Lactic Acid Bacteria: Diversity, Similarity, and New Developments
Source: PubMed Central journal article supplement (PMC4490491; doi:10.3390/ijms160613172), 2015-06-10
Supplement: ijms-16-13172-s001.pdf [file ijms-16-13172-s001.pdf]

# Supplmentary Information

**Table S1.** The plasmids of *Lactobacillus plantarum*.

| Number | Plasmid Name | Strain                                                | Replication | Size (Kb) | (G + C)% | Protein | Gene | Pseudogene | Rep Protein               | Mob Protein | Function                                                                                                                                              | Accession Number | Reference | Ssource                 |
|--------|--------------|-------------------------------------------------------|-------------|-----------|----------|---------|------|------------|---------------------------|-------------|-------------------------------------------------------------------------------------------------------------------------------------------------------|------------------|-----------|-------------------------|
| 1      | p256         | <i>L. plantarum</i> NC7                               | theta       | 7.22      | 36.7     | 10      | 10   | –          |                           |             | A toxin-antitoxin-like plasmid maintenance system                                                                                                     | NC_006278.1      | [40]      |                         |
| 2      | pA1          | <i>L. plantarum</i> A112                              | RCR         | 2.82      | 35       | 2       | 2    | –          | RepA 47 aa<br>RepB 196 aa |             |                                                                                                                                                       | NC_010098.1      | [227]     |                         |
| 3      | pC30il       | <i>L. plantarum</i>                                   | RCR         | 2.14      | 37       | 1       | 1    | –          | Rep 317 aa                |             |                                                                                                                                                       | NC_001370.1      | [228]     |                         |
| 4      | pCMPG5300.01 |                                                       |             | 2.13      | 38       | 2       | 2    | –          | Rep 318 aa                |             |                                                                                                                                                       | CM002919.1       |           |                         |
| 5      | pCMPG5300.02 | <i>L. plantarum</i><br>CMPG5300                       |             | 10.94     | 38.6     | 8       | 9    | 1          | Rep 309 aa                |             | Type II restriction/modification system; DNA helicase, YeeB; Toxin-antitoxin system, PemK/MazF family                                                 | CM002920.1       | [229]     | Vagina of healthy woman |
| 6      | pCMPG5300.03 |                                                       |             | 27.84     | 40.5     | 32      | 34   | 2          | RepA 373 aa<br>Mob 687 aa |             | Antitoxin, RelB/DinJ family; Site-specific recombinase; Pyridine nucleotide-disulfide oxidoreductase; Conjugation protein; Thioredoxin family protein | CM002921.1       |           |                         |
| 7      | pG6301       |                                                       | RCR         | 3.52      | 37.3     | 2       | 2    | –          | Rep 318 aa<br>Mob 361 aa  |             |                                                                                                                                                       | NC_019372.1      |           |                         |
| 8      | pG6302       | <i>L. plantarum</i> G63                               | theta       | 9.11      | 36.4     | 14      | 14   | –          | RepB 200 aa               |             |                                                                                                                                                       | NC_019379.1      | [32]      | Chinese pickle          |
| 9      | pG6303       |                                                       |             | 10.05     | 36.8     | 10      | 10   | –          |                           |             | Cytochrome b; Stress induced DNA binding protein                                                                                                      | NC_019371.1      |           |                         |
| 10     | pLBPP1       |                                                       |             | 51.18     | 39.4     | 57      | 58   | 1          | RepA 300 aa               |             | Nickase; DNA topoisomerase; Cold shock protein; Prophage protein                                                                                      | NC_021233.1      |           |                         |
| 11     | pLBPP2       | <i>L. plantarum</i><br>subsp.<br><i>plantarum</i> P-8 |             | 46.58     | 42.2     | 42      | 44   | 2          |                           |             | Collagen adhesion protein; 6-phospho-β-glucosidase; Galactosidase; Nisin resistance protein; Potassium uptake protein                                 | NC_021225.1      | [230]     |                         |
| 12     | pLBPP3       |                                                       |             | 39.47     | 42.3     | 44      | 44   | –          | RepB 303 aa               |             | Succinate dehydrogenase/fumarate reductase; Peptidoglycan-binding protein; Aspartate aminotransferase                                                 | NC_021226.1      |           |                         |

Table S1. Cont.

| Number | Plasmid Name | Strain                                                | Replication | Size (Kb) | (G + C)% | Protein | Gene | Pseudogene | Rep Protein                | Mob Protein                               | Function                                                                                                                                                             | Accession Number | Reference | Source                         |
|--------|--------------|-------------------------------------------------------|-------------|-----------|----------|---------|------|------------|----------------------------|-------------------------------------------|----------------------------------------------------------------------------------------------------------------------------------------------------------------------|------------------|-----------|--------------------------------|
| 13     | pLBPp4       | <i>L. plantarum</i><br>subsp. <i>plantarum</i><br>P-8 |             | 30.69     | 39.8     | 27      | 27   | –          |                            |                                           | Multidrug efflux pump protein;<br>Transposase; Potassium uptake protein;<br>Cold shock protein; nickase                                                              | NC_021234.1      |           |                                |
| 14     | pLBPp5       |                                                       |             | 16.11     | 42.1     | 18      | 18   | –          | RepB 62 aa                 | MobB 201 aa<br>MobC 197 aa                | Cation-transporting ATPase                                                                                                                                           | NC_021227.1      | [230]     |                                |
| 15     | pLBPp6       |                                                       |             | 8.69      | 36       | 10      | 10   | –          | RepA 311 aa<br>RepB 182 aa |                                           | Stress induced DNA binding protein;<br>Insertion element                                                                                                             | NC_021228.1      |           |                                |
| 16     | pLD1         | <i>L. plantarum</i><br>KLDS 1.0801                    | RCR         | 2.11      | 37.8     | 1       | 1    | –          | Rep318 aa                  |                                           |                                                                                                                                                                      | NC_012220.1      |           |                                |
| 17     | pLFE1        | <i>L. plantarum</i><br>M345                           | RCR         | 4.03      | 34.4     | 5       | 5    | –          | RepA 59 aa<br>RepB 211 aa  | Mob 83 aa                                 | Erythromycin                                                                                                                                                         | NC_012628.1      | [24]      |                                |
| 18     | pLJ42        | <i>L. plantarum</i>                                   | theta       | 5.53      | 42.4     | 4       | 4    | –          | RepA 308 aa                | MobC 112 aa<br>MobA 445 aa<br>MobB 229 aa |                                                                                                                                                                      | NC_019219.1      |           |                                |
| 19     | pLp16A       |                                                       |             | 7.24      | 33.4     | 2       | 2    | –          | Rep 311 aa                 |                                           |                                                                                                                                                                      | NC_021515.1      |           |                                |
| 20     | pLp16B       |                                                       |             | 8.64      | 35.9     | 2       | 2    | –          | RepA 311 aa                |                                           | Peptidoglycan binding<br>domain-containing protein                                                                                                                   | NC_021525.1      |           |                                |
| 21     | pLp16C       |                                                       |             | 27.28     | 39.9     | 32      | 32   | –          | RepA 366 aa                | MobA 376 aa                               | Conjugation protein TrsK                                                                                                                                             | NC_021516.1      |           |                                |
| 22     | pLp16D       |                                                       |             | 37.1      | 40.8     | 38      | 38   | –          | Rep 288 aa                 |                                           | Stress-responsive transcriptional<br>regulator; TraA-like nicking enzyme;<br>Cell-wall-anchored protein                                                              | NC_021526.1      | [20]      | Malt production<br>steep water |
| 23     | pLp16E       | <i>L. plantarum</i> 16                                |             | 40.15     | 41.4     | 41      | 41   | –          | Rep 367 aa                 |                                           |                                                                                                                                                                      | NC_021517.1      |           |                                |
| 24     | pLp16F       |                                                       |             | 50.19     | 39.8     | 57      | 57   | –          | RepB 286 aa                |                                           | Chloride channel protein;<br>Na <sup>+</sup> /H <sup>+</sup> antiporter NapA; Transposase;<br>Potassium uptake protein;<br>Glycine/betaine/carnitine ABC transporter | NC_021518.1      |           |                                |
| 25     | pLp16G       |                                                       |             | 51.86     | 42.6     | 52      | 52   | –          | RepE 512 aa<br>Rep 283 aa  |                                           | Conjugation-related ATPase;<br>DNA topoisomeras malt production steep<br>watere; IS3 family transposase                                                              | NC_021527.1      |           |                                |

Table S1. Cont.

| Number | Plasmid Name | Strain                           | Replication | Size (Kb) | (G + C)% | Protein | Gene | Pseudogene | Rep Protein               | Mob Protein                              | Function                                                                                                                      | Accession Number | Reference | Source                              |
|--------|--------------|----------------------------------|-------------|-----------|----------|---------|------|------------|---------------------------|------------------------------------------|-------------------------------------------------------------------------------------------------------------------------------|------------------|-----------|-------------------------------------|
| 26     | pLp16H       |                                  |             | 74.08     | 41.5     | 74      | 74   | –          | RepB 257 aa<br>Rep 510 aa |                                          | Glucose-1-phosphate<br>thymidyltransferase;<br>Exopolysaccharide biosynthesis protein;<br>Polysaccharide biosynthesis protein | NC_021519.1      |           |                                     |
| 27     | pLp16I       |                                  |             | 13.34     | 37.9     | 8       | 8    | –          | Rep 307 aa                | MobA 269 aa<br>Mob 230 aa                |                                                                                                                               | NC_021528.1      |           |                                     |
| 28     | pLp16L       |                                  |             | 6.46      | 34.7     | 4       | 4    | –          |                           |                                          | Cell surface protein                                                                                                          | NC_021520.1      |           |                                     |
| 29     | pLP18        | <i>L. plantarum</i><br>PC518     | RCR         | 1.81      | 37.5     | 2       | 2    | –          | RepA 237 aa               |                                          |                                                                                                                               | NC_014627.1      | [15]      | Chinese pickle                      |
| 30     | pLP2000      | <i>L. plantarum</i><br>AS1.2986  | RCR         | 2.06      | 38.2     | 1       | 1    | –          | Rep 317 aa                |                                          |                                                                                                                               | NC_003893.1      | [231]     |                                     |
| 31     | pLP2111      | <i>L. plantarum</i><br>CICC 6002 |             | 2.11      | 38.3     | 1       | 1    | –          | Rep 317 aa                |                                          |                                                                                                                               | NC_011497.1      |           |                                     |
| 32     | pLP2140      | <i>L. plantarum</i> S1           |             | 2.14      | 38.3     | 1       | 1    | –          | Rep 393 aa                |                                          |                                                                                                                               | NC_013541.1      |           |                                     |
| 33     | pLP9000      | <i>L. plantarum</i><br>AS1.2986  | RCR         | 9.25      | 37.4     | 9       | 9    | –          |                           |                                          |                                                                                                                               | NC_003894.1      | [231]     |                                     |
| 34     | pLP-ZJ101    |                                  |             | 15.17     | 40.2     | 17      | 17   | –          | RepA 311 aa<br>RepA 98 aa | Mob 389 aa<br>MobC 117 aa<br>MobC 113 aa | Calcium-transporting ATPase                                                                                                   | NC_021903.1      |           |                                     |
| 35     | pLP-ZJ102    | <i>L. plantarum</i> ZJ316        |             | 39.12     | 38.7     | 53      | 53   | –          | RepA 97 aa                |                                          | UDP-glucose 4-epimerase;<br>Galactosyltransferase;<br>Glycosyltransferase;<br>Glycerol-3-phosphate cytidyltransferase         | NC_021904.1      | [232]     | Healthy infant<br>fecal samples     |
| 36     | pLP-ZJ103    |                                  |             | 41.51     | 39.5     | 47      | 47   | –          |                           |                                          | Ribonucleoside-diphosphatereductase                                                                                           | NC_021912.1      |           |                                     |
| 37     | pLR1         | <i>L. plantarum</i> LR1          | RCR         | 2.07      | 37.8     | 2       | 2    | –          | RepA 318 aa               |                                          |                                                                                                                               | NC_011136.1      | [233]     | Sichuan pickle                      |
| 38     | pLTK13       | <i>L. plantarum</i> L137         |             | 34.52     | 39       | 25      | 25   | –          | RepA102 aa<br>RepB 246 aa |                                          | Amylopullulanase; Nickase;<br>Permease; Anaerobicribonucleoside<br>triphosphate reductase                                     | NC_011101.1      | [234]     | Plant traditional<br>fermented food |
| 39     | pLTK2        | <i>L. plantarum</i> L137         |             | 2.3       | 38.6     | 1       | 1    | –          | RepA 317 aa               |                                          |                                                                                                                               | NC_002123.1      | [235]     |                                     |
| 40     | pM4          | <i>L. plantarum</i> M4           | RCR         | 3.32      | 38.7     | 3       | 3    | –          | Rep 318 aa                | Mob 362 aa                               |                                                                                                                               | NC_009666.2      | [31]      | Fresh milk                          |

Table S1. Cont.

| Number | Plasmid Name | Strain                                                  | Replication | Size (Kb) | (G + C)% | Protein | Gene | Pseudogene | Rep Protein                                           | Mob Protein | Function                                                                                                                                       | Accession Number | Reference | Ssource        |
|--------|--------------|---------------------------------------------------------|-------------|-----------|----------|---------|------|------------|-------------------------------------------------------|-------------|------------------------------------------------------------------------------------------------------------------------------------------------|------------------|-----------|----------------|
| 41     | pMD5057      | <i>L. plantarum</i> 5057                                | theta       | 10.88     | 36.2     | 9       | 10   | 1          | RepB 172 aa<br>RepA 311 aa                            |             | Tetracycline resistance                                                                                                                        | NC_004944.1      | [22]      | Corn silage    |
| 42     | pMRI 5.2     | <i>L. plantarum</i><br>BFE 5092                         | RCR         | 5.21      | 35.8     | 7       | 7    | –          | Rep 314 aa<br>RepA 52 aa<br>RepB 215 aa<br>RepC 48 aa | Mob 408 aa  |                                                                                                                                                | NC_019900.1      | [30]      | Fermented milk |
| 43     | pPB1         | <i>L. plantarum</i> BIFI-38                             | RCR         | 2.9       | 37.7     | 4       | 5    | –          | RepB 208 aa                                           | Mob 355 aa  |                                                                                                                                                | NC_006399.1      | [224]     | Wine           |
| 44     | pPLA4        | <i>L. plantarum</i> 423                                 |             | 8.35      |          |         |      |            | RepB 270 aa                                           | Mob 361 aa  | Bacteriocin 423                                                                                                                                | NG_036264.1      | [236]     |                |
| 45     | pR18         | <i>L. plantarum</i> PA18                                | RCR         | 3.21      | 35.8     | 2       | 2    | –          | RepA 317 aa                                           |             | Lincosamide nucleotidyltransferase                                                                                                             | NC_019321.1      | [33]      | Plant          |
| 46     | pST-III      | <i>L. plantarum</i> subsp.<br><i>plantarum</i> ST-III   | theta       | 53.56     | 38.7     | 42      | 45   | 3          | RepB 286 aa                                           |             | A high-affinity K <sup>+</sup> -transport system                                                                                               | NC_014558.2      | [25]      | Chinese pickle |
| 47     | pLP1         | <i>L. plantarum</i><br>CCM1904                          |             |           |          |         |      |            | Rep 317 aa                                            |             |                                                                                                                                                |                  | [237]     |                |
| 48     | pLB4         | <i>L. plantarum</i><br>NCDO1088                         |             |           |          |         |      |            | Rep 52 aa                                             | Mob 361 aa  |                                                                                                                                                |                  | [238]     |                |
| 49     | p8014-2      | <i>L. plantarum</i><br>ATCC 8014                        | RCR         |           |          |         |      |            | Rep 312 aa                                            |             |                                                                                                                                                |                  | [239]     |                |
| 50     | pWCFS101     |                                                         | RCR         | 1.92      | 39.5     | 3       | 3    | –          | RepA 319aa                                            |             |                                                                                                                                                | NC_006375.1      |           |                |
| 51     | pWCFS102     | <i>L. plantarum</i> WCFS1                               | RCR         | 2.36      | 34.3     | 4       | 4    | –          | RepA 52 aa<br>RepB 219 aa                             |             |                                                                                                                                                | NC_006376.1      | [28]      | Human saliva   |
| 52     | pWCFS103     |                                                         | theta       | 36.07     | 40.8     | 43      | 43   | –          | Rep A 102 aa                                          |             | Repressor of arsenical resistance;<br>Arsenical pump-driving ATPase                                                                            | NC_006377.1      |           |                |
| 53     | pXY3         | <i>L. plantarum</i> XY3                                 | RCR         | 2.97      | 38.2     | 7       | 7    | –          | Rep 219 aa                                            |             | Recombinase                                                                                                                                    | NC_013789.1      | [29]      | Koumiss        |
| 54     | pZL2         |                                                         |             | 3.26      | 38.2     | 2       | 2    | 0          | Rep 318 aa                                            | Mob 361 aa  |                                                                                                                                                | NC_024985.1      |           |                |
| 55     | pZL3         |                                                         |             | 11.9      | 37.7     | 15      | 15   | 0          | RepB 311 aa<br>RepA 304 aa                            | MobA 23 aa  | Class II bacteriocin                                                                                                                           | NC_024984.1      |           |                |
| 56     | pZL4         | <i>L. plantarum</i> subsp.<br><i>Plantarum</i> Zhang-11 |             | 12.52     | 39.4     | 11      | 11   | 0          | RepA 311 aa<br>RepB 172 aa                            |             | Type I restriction-Modification protein<br>subunit M; Toxin-antitoxin system;<br>Tyrosine recombinase Int;<br>Glycerol-3-phosphate transporter | NC_024988.1      |           | Fermented rice |

**Table S2.** The plasmids of *Lactococcus latctis*.

| Number | Plasmid Name | Stain                     | Replication | Size (Kb) | (G + C)% | Protein | Gene | Pseudogene | Rep Protein                | Mob Protein                                                | Function                                                                                                             | Accession Number | Reference | Niche            |
|--------|--------------|---------------------------|-------------|-----------|----------|---------|------|------------|----------------------------|------------------------------------------------------------|----------------------------------------------------------------------------------------------------------------------|------------------|-----------|------------------|
| 1      | pAF04        |                           | Theta       | 3.8       | 32       | 4       | 4    | –          | RepB 402 aa                | MobC 122 aa                                                |                                                                                                                      | NC_019347.1      |           |                  |
| 2      | pAF07        |                           | Theta       | 7.44      | 36.4     | 6       | 6    | –          | RepA 296 aa                | MobC 123 aa<br>MobA 320 aa                                 |                                                                                                                      | NC_019348.1      |           |                  |
| 3      | pAF12        |                           | Theta       | 12.07     | 33.3     | 11      | 12   | –          | RepB 441 aa                | MobC 122 aa<br>MobD1 135 aa<br>MobD2 376 aa                | Type I restriction-modification HsdS subunit; MaturaseMatR                                                           | NC_019349.1      | [61]      | Raw milk cheeses |
|        |              | <i>L. lactis</i> DPC3758  |             |           |          |         |      |            |                            |                                                            |                                                                                                                      |                  |           |                  |
| 4      | pAF14        |                           | Theta       | 14.42     | 34.1     | 11      | 13   | –          | RepB 440 aa                | MobC1 164 aa<br>MobA 410 aa<br>MobB 207 aa<br>MobC2 200 aa | Cation transport ATPase; Cadmium efflux ATPase CadA; Cadmium resistance regulator CadC                               | NC_019350.1      |           |                  |
| 5      | pAF22        |                           | Theta       | 22.39     | 34.9     | 23      | 23   | –          | RepB 388 aa                |                                                            | Serine Recombinase family; Conjugation protein                                                                       | NC_019351.1      |           |                  |
| 6      | pAG6         | <i>L. lactis</i> 712      | Theta       | 8.66      | 33.7     | 8       | 8    | –          | RepB 385 aa                |                                                            | Cadmium resistance protein                                                                                           | NC_007191.1      |           |                  |
| 7      | pAH33        |                           | Theta       | 6.16      | 35.9     | 7       | 7    | –          | RepB 386 aa                |                                                            | Type I R/M system, R/M82; Magnesium transporter CorA; Cytochrome B; Type I specificity subunit; HsdS                 | NC_002150.1      | [72]      |                  |
|        |              | <i>L. lactis</i> DPC220   |             |           |          |         |      |            |                            |                                                            |                                                                                                                      |                  |           |                  |
| 8      | pAH82        |                           | Theta       | 20.33     | 34.4     | 17      | 17   | –          | RepB 386 aa                |                                                            | Phage resistance; Cadmium resistance regulator CadC; Serine/threonine protein phosphatase; Type I R/M system, R/M 82 | NC_004966.1      |           |                  |
| 9      | pAH90        | <i>L. lactis</i>          | Theta       | 26.49     | 34.8     |         |      |            |                            |                                                            | Phage resistance; Type I specificity subunits, hsdSI, hsdSII; Cadmium resistance; Magnesium/cobalt transporter, corA |                  | [240]     |                  |
| 10     | pAR141       | <i>L. lactis</i> M14      | RCR         | 1.59      | 36.1     | 2       | 2    | –          | RepB 192 aa                |                                                            |                                                                                                                      | NC_013783.1      | [103]     |                  |
| 11     | pAW153       | <i>L. lactis</i> W15      | Theta       | 7.12      | 31.4     | 8       | 8    | –          | RepB 391 aa<br>RepX 154 aa |                                                            | restriction-modification (R/M) system LlaCI                                                                          | NC_017494.1      | [71]      |                  |
| 12     | pBL1         | <i>L. lactis</i> IPLA 972 | Theta       | 10.9      | 32.6     | 8       | 8    | –          | RepB 385 aa                |                                                            | Lactococcin 972 production, lclA Bacteriocin immunity, lclB                                                          | NC_004955.1      | [57]      |                  |
| 13     | pBM02        | <i>L. lactis</i> P8-2-47  | RCR         | 3.85      | 35.7     | 6       | 6    | –          | RepA 49 aa<br>RepB 213 aa  | Mob-like 304 aa                                            |                                                                                                                      | NC_004930.1      | [102]     |                  |

Table S2. Cont.

| Number | Plasmid Name | Stain                                           | Replication | Size (Kb) | (G + C)% | Protein | Gene | Pseudogene | Rep Protein                              | Mob Protein                | Function                                                                                                                                                                                                                              | Accession Number | Reference | Niche                |
|--------|--------------|-------------------------------------------------|-------------|-----------|----------|---------|------|------------|------------------------------------------|----------------------------|---------------------------------------------------------------------------------------------------------------------------------------------------------------------------------------------------------------------------------------|------------------|-----------|----------------------|
| 14     | pCD4         | <i>L. lactis</i> MJC15                          | Theta       | 6.09      | 33.4     | 5       | 6    | –          | RepB 386 aa                              |                            | Type I specificity subunit; HsdS tyrosine family DNA recombinase OrfA                                                                                                                                                                 | NC_002748.1      | [89]      |                      |
| 15     | pCI2000      | <i>L. lactis</i> subsp. <i>lactis</i> 275       | Theta       |           |          |         |      |            | RepA 391 aa                              |                            |                                                                                                                                                                                                                                       | NG_035219.1      | [91]      |                      |
| 16     | pCI305       | <i>L. lactis</i> UC317                          | Theta       | 8.69      | 32.4     | 8       | 8    | –          | RepB 386 aa                              |                            | Type I specificity subunit, hsdS                                                                                                                                                                                                      | NC_002502.1      | [86]      |                      |
| 17     | pCI528       | <i>L. lactis</i> subsp. <i>cremoris</i> UC503   | Theta       |           |          |         |      |            | Rep 383 aa                               |                            | Type I restriction enzyme specificity protein                                                                                                                                                                                         | AF013595.1       | [241]     |                      |
| 18     | pCIS1        |                                                 | Theta       | 4.26      | 32       | 2       | 2    | –          | RepB 383 aa                              |                            | Type I restriction enzyme specificity protein                                                                                                                                                                                         | NC_019438.1      |           |                      |
| 19     | pCIS2        |                                                 | Theta       | 5.46      | 30.1     | 5       | 6    | –          | RepB 400 aa                              | MobC 122 aa                | Putative cytochrome B                                                                                                                                                                                                                 | NC_019434.1      |           |                      |
| 20     | pCIS3        |                                                 | Theta       | 6.16      | 35.9     | 4       | 5    | –          | RepB 386 aa                              |                            | Defense mechanisms; Methylase_S; Mg <sup>2+</sup> and Co <sup>2+</sup> transporter; Inorganic ion transport and metabolism; Family: CorA                                                                                              | NC_019433.1      |           |                      |
| 21     | pCIS4        |                                                 | Theta       | 7.05      | 38.4     | 8       | 9    | –          | RepA 309 aa<br>RepB 163 aa               | MobC 122 aa                | Signal transduction mechanisms (protein-tyrosine-phosphatase); ABC transporter                                                                                                                                                        | NC_019437.1      |           |                      |
| 22     | pCIS5        | <i>L. lactis</i> subsp. <i>cremoris</i> UC509.9 | Theta       | 11.68     | 34.1     | 11      | 12   | –          | RepB 309 aa<br>OrfX 269 aa               |                            | IS6 family transposase; Putative regulatory protein; Coenzyme transport and metabolism; IS982 family transposase                                                                                                                      | NC_019432.1      | [55]      | Irish dairy starter. |
| 23     | pCIS6        |                                                 | Theta       | 38.67     | 37.1     | 27      | 30   | –          | RepB 381 aa<br>OrfX 189 aa<br>RepC 76 aa | MobD 505 aa<br>MobC 161 aa | Glycopeptide antibiotics resistance protein; IS6 family transposase; Transposase; amidase/aminoacylase; Peptidase E; Pyrrolidone-carboxylate peptidase                                                                                | NC_019436.1      |           |                      |
| 24     | pCIS7        |                                                 | Theta       | 53.05     | 32.4     | 41      | 50   | –          | RepB 450 aa<br>OrfX 196 aa               | MobC 122 aa                | IS982 family transposase; Cell cycle control; IS6 family transposase; Amino acid transport and metabolism (para-aminobenzoate synthase component II); Carbohydrate transport and metabolism (permease, major facilitator superfamily) | NC_019431.1      |           |                      |

Table S2. Cont.

| Number | Plasmid Name | Stain                                            | Replication | Size (Kb) | (G + C)% | Protein | Gene | Pseudogene | Rep Protein                              | Mob Protein                                 | Function                                                                                                                                                      | Accession Number | Reference | Niche            |
|--------|--------------|--------------------------------------------------|-------------|-----------|----------|---------|------|------------|------------------------------------------|---------------------------------------------|---------------------------------------------------------------------------------------------------------------------------------------------------------------|------------------|-----------|------------------|
| 25     | pCIS8        |                                                  | Theta       | 80.59     | 34       | 67      | 79   | –          | RepB 385 aa<br>RepB385 aa<br>RepB 383 aa | MobA 673 aa                                 | IS6 family transposase; Mn <sup>2+</sup> /Fe <sup>2+</sup> transporter;<br>Universal stress protein                                                           | NC_019430.1      |           |                  |
| 26     | pCL2.1       | <i>L. lactis</i><br>ML8                          | RCR         | 2.05      | 34       | 2       | 3    | –          | RepB 203 aa                              |                                             |                                                                                                                                                               | NC_004981.2      | [100]     |                  |
| 27     | pCRL1127     | <i>L. lactis</i><br>CRL1127                      | Theta       | 8.28      | 34.8     | 7       | 7    | –          | RepB 385 aa                              |                                             | Citrate permease plasmid; Putative translational regulators, citQ, citR                                                                                       | NC_003101.1      |           |                  |
| 28     | pCRL291.1    | <i>L. lactis</i>                                 | Theta       | 4.64      | 33.51    | 3       | 3    | –          |                                          |                                             |                                                                                                                                                               | NC_002799.1      |           |                  |
| 29     | pCV56A       |                                                  | Theta       | 44.1      | 32.1     | 39      | 41   | 2          | RepB 386 aa                              | MobC 122 aa<br>MobD 503 aa                  | Type II restriction-modification system;<br>Acetyltransferase; DNA RepAir ATPase; Recombinase A                                                               | NC_017483.1      |           |                  |
| 30     | pCV56B       |                                                  | Theta       | 35.93     | 34.5     | 28      | 33   | 5          | RepB 383 aa<br>RepX 196 aa               | MobC1 121 aa<br>MobA 410 aa<br>MobC2 200 aa | type I restriction-modification system; Mg <sup>2+</sup> and Co <sup>2+</sup><br>transporter; DNA-invertase /resolvase; Amidase;<br>Oxalate/FormateAntiporter | NC_017487.1      |           | Vaginas of       |
| 31     | pCV56C       | <i>L. lactis</i><br>subsp.<br><i>lactis</i> CV56 | Theta       | 31.44     | 32.5     | 29      | 31   | 2          | RepB 1392 aa<br>RepX 253 aa              | MobD 505 aa<br>MobC 122 aa                  | Conjugation protein; Resolvase; Copper-potassium<br>Transporting ATPase B; Cytochrome B                                                                       | NC_017484.1      | [62]      | Healthy<br>Women |
| 32     | pCV56D       |                                                  | Theta       | 5.54      | 32.2     | 8       | 8    | –          | RepB 386 aa<br>RepX 118 aa               |                                             | Cytochrome B                                                                                                                                                  | NC_017485.1      |           |                  |
| 33     | pCV56E       |                                                  | RCR         | 2.26      | 33.8     | 3       | 3    | –          | RepA 232 aa<br>RepC 49 aa                |                                             |                                                                                                                                                               | NC_017488.1      |           |                  |
| 34     | pDBORO       | <i>L. lactis</i><br>DB0410                       | Theta       | 16.4      | 35.2     | 15      | 15   | –          | RepB 383 aa                              |                                             | The toxic pyrimidine analogue 5-fluoroorotate                                                                                                                 | NC_009137.1      | [67]      |                  |
| 35     | pDI25        | <i>L. lactis</i><br>subsp.<br><i>lactis</i> 5136 | RCR         | 5.5kb     |          |         |      |            | Rep 233 aa                               |                                             |                                                                                                                                                               |                  | [98]      |                  |
| 36     | pDR1-1       | <i>L. lactis</i>                                 | Theta       | 7.41      | 33.7     | 6       | 6    | –          | RepB 423 aa                              |                                             | Type I R/M system specificity subunit                                                                                                                         | NC_004164.2      | [242]     |                  |
| 37     | pDR1-1B      | <i>L. lactis</i><br>DRC1                         | Theta       | 7.34      | 33.74    | 6       | 6    | –          | RepB 386 aa                              |                                             | Type I specificity subunit, hsdS                                                                                                                              | NC_004163.1      | [242]     |                  |

Table S2. Cont.

| Number | Plasmid Name | Stain                                               | Replication | Size (Kb) | (G + C)% | Protein | Gene | Pseudogene | Rep Protein                              | Mob Protein                               | Function                                                                                                                          | Accession Number | Reference | Niche |
|--------|--------------|-----------------------------------------------------|-------------|-----------|----------|---------|------|------------|------------------------------------------|-------------------------------------------|-----------------------------------------------------------------------------------------------------------------------------------|------------------|-----------|-------|
| 38     | pFV1201      | <i>L. lactis</i> subsp. <i>cremoris</i> KH (MG1614) | Theta       |           |          |         |      |            | RepB 385 aa                              |                                           |                                                                                                                                   | NG_034745.1      | [243]     |       |
| 39     | pGdh442      | <i>L. lactis</i> NCDO1867                           | Theta       | 68.32     | 35.1     | 63      | 67   | 1          | RepB 450 aa                              | MobC 122 aa                               | GlutamateDehydrogenase; Orotate transporter                                                                                       | NC_009435.1      | [66]      |       |
| 40     | pHP003       | <i>L. lactis</i> HP                                 | Theta       | 13.43     | 40.1     | 6       | 6    | –          | RepB 385 aa<br>RepC 76 aa                |                                           | Lactocepilin genes, prtP, prtM                                                                                                    | NC_004847.1      | [75]      |       |
| 41     | pIL1         |                                                     | Theta       | 6.38      | 32.3     | 7       | 7    | –          | RepB 385 aa                              |                                           | Type I S-subunit protein; IS-like element; Citrate permease/transporter                                                           | NC_015860.1      |           |       |
| 42     | pIL2         |                                                     | Theta       | 8.28      | 34.8     | 10      | 10   | –          | RepB 402 aa                              |                                           | Resolvase; Major facilitator superfamily permease; Multicopperoxidase; Nicotinamide mononucleotide transporter                    | NC_017489.1      |           |       |
| 43     | pIL3         | <i>L. lactis</i> IL594                              | Theta       | 19.24     | 35.1     | 20      | 20   | –          | RepB 394 aa                              | MobC 122 aa                               | Transposase; Na <sup>+</sup> /H <sup>+</sup> antiporter; K <sup>+</sup> transporter; K <sup>+</sup> transport system protein      | NC_015861.1      | [63]      |       |
| 44     | pIL4         |                                                     | Theta       | 48.98     | 35.1     | 47      | 50   | –          | RepB1 384 aa<br>RepB 388 aa              | MobC 123 aa<br>MobD 505 aa                | Peptidase E; Cadmium resistance regulator CadC; Cadmium efflux ATPase CadA; Glycopeptide antibiotics resistance protein           | NC_015862.1      |           |       |
| 45     | pIL5         |                                                     | Theta       | 23.4      | 34.5     | 22      | 22   | –          | RepB 383 aa<br>RepX 206 aa               | MobA 410 aa<br>MobB 207 aa<br>MobC 200 aa | Type I R/M system restriction subunit; Type I R/M system methylation subunit; Cold shock proteins C and D                         | NC_015863.1      |           |       |
| 46     | pIL6         |                                                     | Theta       | 28.43     | 33.6     | 25      | 27   | –          | RepB 445 aa                              | MobC 122 aa<br>MobD 503 aa                | Type I S-subunit protein; IS-like element; Citrate permease/transporter                                                           | NC_019308.1      |           |       |
| 47     | pIL7         |                                                     | Theta       | 28.55     | 34.1     | 26      | 28   | –          | RepB 383 aa<br>RepC 76 aa<br>RepA 450 aa | MobC 122 aa<br>MobD 505 aa                | HsdSsubunit; dynamin; IS-LL6 transposase/hypothetical protein; 2-dehydropantoate 2-reductase; Type I restriction enzyme R protein | NC_015864.1      |           |       |
| 48     | pIL103       | <i>L. lactis</i> IL964                              | Theta       |           |          |         |      |            | RepB 383 aa                              |                                           | Type Ic restriction-modification system                                                                                           | NG_034966.1      | [244]     |       |
| 49     | pIL105       | <i>L. lactis</i> IL964                              | Theta       | 8.506     | 29.8     | 7       | 7    | –          | RepB 402 aa                              |                                           | Phage abortive infection gene, abiD1                                                                                              | NC_000906.2      | [245]     |       |
| 50     | pIL2614      | <i>L. lactis</i> IL1403                             | Theta       | 10.066    |          |         |      |            | RepB 386 aa                              |                                           | Type IC restriction subunit                                                                                                       | NG_034933.1      | [246]     |       |



Table S2. Cont.

| Number | Plasmid Name | Stain                                           | Replication | Size (Kb) | (G + C)% | Protein | Gene | Pseudogene | Rep Protein                | Mob Protein | Function                                                                                                                                             | Accession Number | Reference | Niche                               |
|--------|--------------|-------------------------------------------------|-------------|-----------|----------|---------|------|------------|----------------------------|-------------|------------------------------------------------------------------------------------------------------------------------------------------------------|------------------|-----------|-------------------------------------|
| 51     | pJW563       | <i>L. lactis</i> subsp.                         | Theta       | 11.5      |          |         |      |            | RepB 385 aa                |             |                                                                                                                                                      | NG_034688.1      |           |                                     |
| 52     | pJW566       | <i>Cremoris</i> W56 (MG1614)                    | Theta       |           |          |         |      |            | RepB 389 aa                |             |                                                                                                                                                      | NG_034747.1      | [88]      |                                     |
| 53     | pK214        | <i>L. lactis</i> K214                           | Theta       | 29.87     | 32.4     | 29      | 33   | 2          | RepB 384 aa                | Mob 403 aa  | Multidrug transport protein, mdtA<br>Streptomycin resistance, str; Chloramphenicol resistance, cat; Tetracycline resistance, tetS                    | NC_009751.1      | [247]     |                                     |
| 54     | pKF147A      | <i>L. lactis</i> subsp. <i>lactis</i> KF147     | Theta       | 37.51     | 32.4     | 29      | 38   | 9          | RepA 450 aa                |             | Metal-dependent membrane protease;<br>XRE family transcriptional regulator;<br>IS6/IS1216E family transposase;<br>Potassium transport system protein | NC_013657.1      | [68]      | Mung bean sprouts                   |
| 55     | pKL001       | <i>L. lactis</i> KLDS4.0319-3                   | Theta       | 6.07      | 32.9     | 4       | 4    | –          | RepB 355 aa                |             | Thymidylate kinase;<br>Orotidine-5-phosphate decarboxylase                                                                                           | NC_011610.1      |           |                                     |
| 56     | pKP1         | <i>L. lactis</i> BGKP1                          | Theta       | 16.18     | 35.9     | 7       | 7    | –          | RepB 386 aa<br>RepX 195 aa |             | Pyroglutamate carboxylate peptidase;<br>Mucin-binding domain-containing protein;<br>Bacterial cell aggregation                                       | NC_016042.1      | [248]     | Artisanal semi-hard homemade cheese |
| 57     | pL2          | <i>L. lactis</i>                                | Theta       | 5.3       | 32.5     | 5       | 5    | –          | RepB 386 aa                |             |                                                                                                                                                      | NC_008594.1      | [249]     |                                     |
| 58     | pLP712       | <i>L. lactis</i> NCDO712                        | Theta       | 55.4      | 37.4     | 44      | 61   | 17         | RepC 76 aa<br>RepA 450 aa  |             | Encode genes for lactose catabolism<br>and a serine proteinase involved<br>in casein degradation                                                     | NC_019377.1      | [64]      |                                     |
| 59     | pMN5         | <i>L. lactis</i> BGMN1-5                        | RCR         | 5.67      | 30.3     | 4       | 4    | –          | RepA 316 aa                |             | GroupIIc bacteriocin genes, lsbA,<br>lsbB Multidrug transporter, lmrB;                                                                               | NC_004922.1      | [58]      |                                     |
| 60     | pMRC01       | <i>L. lactis</i> DPC3147                        | Theta       | 60.23     | 30.11    | 63      | 64   | –          | RepB 384 aa                |             | Phage resistance, Lactacin 3147                                                                                                                      | NC_001949.1      | [56]      |                                     |
| 61     | pNCDO2118    | <i>L. lactis</i> subsp. <i>lactis</i> NCDO 2118 | Theta       | 37.571    | 32.3     | 32      |      |            | RepA 450 aa                |             |                                                                                                                                                      | NZ_CP009055.1    | [96]      | Frozen peas                         |
| 62     | pND302       | <i>L. lactis</i> M71                            | Theta       |           |          |         |      |            | RepB 385 aa                |             |                                                                                                                                                      | NG_034801.1      | [60]      |                                     |
| 63     | pND324       | <i>L. lactis</i> M127                           | Theta       | 3.6       | 33.4     | 3       | 3    | –          | RepB 383 aa<br>RepC 76 aa  |             |                                                                                                                                                      | NC_008436.1      | [77]      |                                     |

Table S2. Cont.

| Number | Plasmid Name | Stain                                          | Replication | Size (Kb) | (G + C)% | Protein | Gene | Pseudogene | Rep Protein                                                  | Mob Protein | Function                                                                                                             | Accession Number | Reference | Niche             |
|--------|--------------|------------------------------------------------|-------------|-----------|----------|---------|------|------------|--------------------------------------------------------------|-------------|----------------------------------------------------------------------------------------------------------------------|------------------|-----------|-------------------|
| 64     | pND608       | <i>L. lactis</i> FG2                           | Theta       |           |          |         |      |            | Rep 386 aa                                                   |             |                                                                                                                      | U26550.1         | [250]     |                   |
| 65     | pNP40        | <i>L. lactis</i> DRC3                          | Theta       | 64.98     | 32.3     | 62      | 62   | –          | RepA 398 aa<br>RepB 282 aa                                   |             | Bacteriophage resistance systems                                                                                     | NC_010901.1      | [73]      |                   |
| 66     | pNZ4000      | <i>L. lactis</i><br>NIZO B40                   | Theta       | 42.81     | 33.3     | 45      | 45   | –          | RepB1 399 aa<br>RepB2 401 aa<br>RepB3 383 aa<br>RepB4 388 aa |             | Exopolysaccharide biosynthesis, Eps gene cluste<br>Magnesium/cobalt transporter,<br>corA conjugative transfer region | NC_002137.1      | [70]      |                   |
| 67     | pQA504       | <i>L. lactis</i> subsp.<br><i>cremoris</i> A76 | Theta       | 3.98      | 37.8     | 3       | 3    | –          | Rep 508 aa                                                   | Mob 449 aa  |                                                                                                                      | NC_017497.1      |           |                   |
| 68     | pQA518       |                                                | Theta       | 17.66     | 37.4     | 12      | 12   | –          | Rep 388 aa                                                   |             | DNA restrictase                                                                                                      | NC_017495.1      |           |                   |
| 69     | pQA549       |                                                | Theta       | 49.22     | 35.1     | 42      | 42   | –          | Rep 384 aa<br>Rep 391 aa                                     |             | Serine protease                                                                                                      | NC_017493.1      | [95]      | Cheese production |
| 70     | pQA554       |                                                | Theta       | 53.63     | 34.9     | 69      | 69   | –          | Rep 450 aa                                                   |             |                                                                                                                      | NC_017496.1      |           |                   |
| 71     | pS7a         | <i>L. lactis</i> S50                           | Theta       | 7.301     | 33.4     | 5       | 5    | –          | RepB 383 aa                                                  |             | Type I specificity subunit, hsdS                                                                                     | NC_004652.1      |           |                   |
| 72     | pS7b         |                                                | Theta       | 7.263     | 33.65    | 5       | 5    | –          | RepB 421 aa                                                  |             | Type I specificity subunit, hsdS                                                                                     | NC_004653.1      | [76]      |                   |
| 73     | pSH71        | <i>L. lactis</i> subsp.<br><i>cremoris</i>     | RCR         |           |          |         |      |            |                                                              |             |                                                                                                                      | A09338.1         | [97]      |                   |
| 74     | pSK11A       | <i>L. lactis</i> SK11                          | Theta       | 10.37     | 30.9     | 13      | 14   | –          | RepB 385 aa<br>RepX 214 aa                                   | MobC 122 aa | Serine/threonine phosphatase<br>family protein                                                                       | NC_017498.1      |           | Cheese making     |
| 75     | pSK11B       |                                                | Theta       | 13.33     | 34.3     | 14      | 15   | –          | RepB1 388 aa<br>RepX1 200 aa<br>RepX1 178 aa<br>RepB2 386 aa |             | Putative DNA segregation ATPase;<br>$\alpha$ -acetolactate decarboxylase                                             | NC_013551.1      | [65]      |                   |
| 76     | pSK11L       |                                                | Theta       | 47.17     | 34.8     | 40      | 45   | 1          | RepB1 384 aa;<br>RepB2 391 aa                                | MobA 673 aa | Serine protease NisP                                                                                                 | NC_017478.1      |           |                   |
| 77     | pSK11P       |                                                | Theta       | 75.81     | 35.4     | 61      | 83   | 2          | RepB 388 aa<br>RepX 192 aa<br>RepC 76 aa                     |             | EPS biosynthesis protein; Pyrrolidone-carboxylate<br>peptidase; Multicopper oxidase family protein                   | NC_017500.1      |           |                   |

Table S2. Cont.

| Number | Plasmid Name | Stain                                                                             | Replication | Size (Kb) | (G + C)% | Protein | Gene | Pseudogene | Rep Protein                | Mob Protein                                                | Function                                                                                                                                                                                             | Accession Number | Reference | Niche              |
|--------|--------------|-----------------------------------------------------------------------------------|-------------|-----------|----------|---------|------|------------|----------------------------|------------------------------------------------------------|------------------------------------------------------------------------------------------------------------------------------------------------------------------------------------------------------|------------------|-----------|--------------------|
| 78     | pSL2         | <i>L. lactis</i> ssp. <i>Lactis</i><br>biovar. Diacety<br><i>lactis</i> Bu2       | Theta       |           |          |         |      |            | RepB 385 aa                |                                                            |                                                                                                                                                                                                      | NG_034642.1      | [251]     |                    |
| 79     | pSRQ700      |                                                                                   | Theta       | 7.78      | 34.2     | 9       | 9    | –          | RepB 438 aa                |                                                            | Type II R/M system, LlaDCHI;<br>Type I specificity subunit, hsdS                                                                                                                                     | NC_002798.1      |           |                    |
| 80     | pSRQ800      | <i>L. lactis</i> DCH-4                                                            | Theta       | 7.86      | 31.3     | 7       | 7    | –          | RepB 401 aa                |                                                            | Abortive infection gene, abiK;<br>Type I specificity subunit, hsdS                                                                                                                                   | NC_004960.1      | [252]     |                    |
| 81     | pSRQ900      |                                                                                   | Theta       | 10.84     | 31.1     | 11      | 11   | –          | RepB 386 aa                |                                                            | Abortive infection gene, abiQ;<br>Type I specificity subunit, hsdS                                                                                                                                   | NC_004959.1      |           |                    |
| 82     | pUCL22       | <i>L. lactis</i> Z270                                                             | Theta       |           |          |         |      |            | RepA 388 aa<br>RepB 119 aa |                                                            |                                                                                                                                                                                                      | X60454.1         | [94]      |                    |
| 83     | pVF18        |                                                                                   | Theta       | 18.98     | 33.9     | 21      | 25   | 4          | RepB 385 aa                |                                                            | IS1216 transposase; Type I<br>restriction-modification system                                                                                                                                        | NC_015900.1      |           |                    |
| 84     | pVF21        |                                                                                   | Theta       | 21.73     | 33.6     | 14      | 16   | 2          | RepB 383 aa<br>Rep 209 aa  |                                                            | Type I restriction-modification<br>system; Glutamate dehydrogenase;<br>Cadmium efflux ATPase CadA                                                                                                    | NC_015912.1      | [69]      | Raw milk<br>cheese |
| 85     | pVF22        | <i>L. lactis</i> subsp. <i>Lactis</i><br>bv. <i>diacetylactis</i> str.<br>DPC3901 | Theta       | 22.17     | 35.1     | 19      | 21   | 2          | RepB 441 aa<br>Rep 345 aa  | MobC1 164 aa<br>MobA 410 aa<br>MobB 207 aa<br>MobC2 200 aa | Mg <sup>2+</sup> and Co <sup>2+</sup> transport protein<br>corA1; Tetracycline resistance<br>protein; Cytochrome B                                                                                   | NC_015901.1      |           |                    |
| 86     | pVF50        |                                                                                   | Theta       | 53876     | 34.5%    | 52      | 52   |            | RepA 450 aa                | MobC 148 aa<br>MobD 170 aa                                 | IS116/IS110/IS902 family<br>transposase; Cation transport<br>ATPase; Copper chaperone; FNR<br>family transcriptional regulator;<br>Oligopeptide ABC transporter;<br>Sodium/hydrogen exchanger family | NC_015902.1      |           |                    |
| 87     | pVS40        | <i>L. lactis</i>                                                                  | Theta       |           |          |         |      |            | Rep 399 aa                 |                                                            |                                                                                                                                                                                                      | L02920.1         | [253]     |                    |
| 88     | pWC1         | <i>L. lactis</i> 2204.                                                            | RCR         | 2.85      | 29.5     | 1       | 1    | –          | Rep 316 aa                 |                                                            |                                                                                                                                                                                                      | NC_004980.1      | [101]     |                    |
| 89     | pWVO1        | <i>L. lactis</i>                                                                  | RCR         | 2.18      | 33.4     | 4       | 4    | –          | Rep 232 aa                 |                                                            |                                                                                                                                                                                                      | NC_002192.1      | [99]      |                    |
| 90     | pWVO2        | <i>L. lactis</i> Wg2                                                              | Theta       | 3.83      | 31.3     | 1       | 1    | –          | RepB 383 aa                |                                                            | Cryptic                                                                                                                                                                                              | NC_002193.1      | [87]      |                    |

Table S2. Cont.

| Number | Plasmid Name | Stain                                             | Replication | Size (Kb) | (G + C)% | Protein | Gene | Pseudogene | Rep Protein               | Mob Protein               | Function                                                                                                                                                                 | Accession Number | Reference | Niche             |
|--------|--------------|---------------------------------------------------|-------------|-----------|----------|---------|------|------------|---------------------------|---------------------------|--------------------------------------------------------------------------------------------------------------------------------------------------------------------------|------------------|-----------|-------------------|
| 91     | pWVO4        | <i>L. lactis</i> Wg2                              | Theta       |           |          |         |      |            | RepB 401 aa               |                           |                                                                                                                                                                          | CAA80965.1       | [107]     |                   |
| 92     | pWVO5        |                                                   | Theta       |           |          |         |      |            | RepB 381 aa               |                           |                                                                                                                                                                          | CAA80966.1       |           |                   |
| 93     | 1            | <i>L. lactis</i> subsp. <i>cremoris</i> SK11      | Theta       | 14.04     | 34.4     | 10      | 11   | 1          | Rep 386 aa<br>Rep 296 aa  | Mob 322 aa                | Lactococcin A; Bacteriocin-processing peptidase; Nucleoid DNA-binding protein                                                                                            | NC_008503.1      | [165]     |                   |
| 94     | 2            |                                                   | Theta       | 9.55      | 30.4     | 6       | 8    | 2          | Rep 385 aa                |                           | Diadenosinetetraphosphatase-like protein; Transposase; Response regulator                                                                                                | NC_008504.1      |           |                   |
| 95     | 3            |                                                   | Theta       | 74.75     | 35.4     | 61      | 66   | 3          | Rep 388 aa<br>RepB 174 aa | Mob 234 aa<br>MobC 122 aa | Multicopper oxidase; Lactocepin I aminodeoxychorismate synthase; MaturaseMatR; Exopolysaccharide biosynthesis protein; Mg <sup>2+</sup> and Co <sup>2+</sup> transporter | NC_008505.1      |           |                   |
| 96     | 4            |                                                   | Theta       | 47.21     | 34.8     | 35      | 39   | 4          | Rep 384 aa                |                           | Cellobiose-specific PTS system; Tagatose-6-phosphate kinase; Lactose transport regulator; Oligopeptidase F; Carbon starvation protein                                    | NC_008506.1      |           |                   |
| 97     | 5            |                                                   | Theta       | 14.21     | 33.5     | 8       | 8    | –          | Rep 443 aa                |                           | Superfamily II DNA/RNA helicase                                                                                                                                          | NC_008507.1      |           |                   |
| 98     | 1            | <i>L. lactis</i> subsp. <i>lactis</i> KLDS 4.0325 | Theta       | 4.09      | 30       | 6       | 6    | –          |                           |                           |                                                                                                                                                                          | NC_022587.1      | [254]     | Home-made koumiss |
| 99     | 2            |                                                   | Theta       | 0.87      | 32.6     | 2       | 2    | –          |                           |                           |                                                                                                                                                                          | -                |           |                   |
| 100    | 3            |                                                   | Theta       | 1.28      | 32.6     | 3       | 3    | –          | RepB 232 aa               |                           |                                                                                                                                                                          | -                |           |                   |
| 101    | pCIS3        | <i>L. lactis</i> UC509.9                          | Theta       | 6.16      | 35.9     | 3       | 4    | –          | RepB 386 aa               |                           | Magnesium/cobalt transporter, corAType I specificity subunit, hsdS                                                                                                       | NC_002138.1      | [255]     |                   |
